# Supplementary material for: Pediatric reference interval verification for 17 specialized immunoassays and cancer markers on the Abbott Alinity i system in the CALIPER cohort of healthy children and adolescents
Source: publisher site journal article supplement (doi:10.1515/cclm-2022-0709), 2022-09-19
Supplement: Supplementary file 1 [file j_cclm-2022-0709_suppl_002.docx]

**Supplementary Table 1**. Assay-specific information and analytical validation results.

| **Assay Information** | | |  | **Precision** | | | | | | **Method Comparison** | | | | **Linearity** | | |
| --- | --- | --- | --- | --- | --- | --- | --- | --- | --- | --- | --- | --- | --- | --- | --- | --- |
| **Assay** | **Method** | **Calibration Traceability** | **Unit** | **L1 Mean** | **L1 CV** | **L2 Mean** | **L2 CV** | **L3 Mean** | **L3 CV** | **N** | **Slope** | **Intercept** | **Pearson R** | **Slope** | **Intercepy** | **R^2** |
| **Anti-CCP**  (11429UP00) | CMIA | *The units of anti-CCP antibody per mL within a human plasma sample demonstrating high levels of anti-CCP IgG activity were defined by Axis-Shield Diagnostics using a commercially available second-generation anti-CCP assay. The calibrators for the Alinity i Anti-CCP assay are manufactured by dilution and are referenced to this high-level sample.* | kU/L | <0.5 | * | 22.9 | 2.8% | NA | NA | 30 | 1.12 | -0.69 | 0.973 | 1.02 | 1.3 | 0.997 |
| **Anti-Tg**  (90375UN20) | CMIA | *Calibrators are standardized against the World Health Organization 1st International Reference Preparation 65/093.* | kU/L | 0.66 | 7.8% | 159 | 2.2% | NA | NA | 41 | 1.05 | -1.36 | 0.984 | 1 | 2.8 | 0.998 |
| **Anti-TPO**  (80550UN21) | CMIA | *Calibrators are standardized against International Reference Preparations MRC 66/387* | kU/L | 0 | NA | 74.9 | 3.30% | NA | NA | 21 | 0.99 | -2.92 | 0.987 | 1.01 | 0.6 | 0.999 |
| **beta hCG**  (32296UD00) | CMIA | *Calibrators are manufactured gravimetrically and referenced to the World Health Organization (WHO) 4th International standard 75/589 for β-hCG at each concentration level.* | IU/L | 25 | 3.9% | 758 | 2.8% | 5015 | 2.3% | 32 | 0.93 | 6.46 | 0.999 | 1.00 | 136.9 | 0.999 |
| **CA 125-II**  (28146FP00) | CMIA | *Calibrators are manufactured volumetrically and are referenced to a standard prepared by Fujirebio Diagnostics, Inc. There is no internationally recognized CA 125 standard available at this time.* | kU/L | 41 | 2.8% | 318 | 1.7% | 685 | 2.4% | 33 | 0.99 | -5.32 | 0.990 | 1.00 | 26.2 | 0.996 |
| **CA 15-3**  (31330CP00) | CMIA | *Calibrators are manufactured volumetrically and are referenced to this standard prepared by Fujirebio Diagnostics, Inc. There is no internationally recognized CA 15-3 standard available at this time.* | kU/L | 38.4 | 3.4% | 232 | 3.4% | NA | NA | 28 | 0.73 | 3.14 | 0.975 | 1.00 | 3.2 | 0.998 |
| **CA 19-9**  (27081FP00) | CMIA | *Calibrators are manufactured volumetrically and are referenced to this standard prepared by Fujirebio Diagnostics, Inc. There is no internationally recognized CA 19-9 standard available at this time.* | kU/L | 40 | 5.2% | 150 | 4.8% | 780 | 4.7% | 38 | 1.04 | -5.61 | 0.996 | 1.02 | 21.1 | 0.998 |
| **CEA**  (2213FN00) | CMIA | *Internal standards are referenced to the World Health Organization (W.H.O.) First International Standard 73/601 for CEA at each concentration level. Alinity i CEA Calibrators are manufactured by dilution and tested against these internal reference standards.* | ng/mL | 4.78 | 3.5% | 19.3 | 2.7% | 101 | 3.5% | 37 | 0.93 | -0.86 | 0.999 | 0.98 | 3.9 | 0.996 |
| **Cortisol**  (034804212) | CMIA | *Calibr+C3:C11ators are matched to internal reference standards, which are manufactured gravimetrically using cortisol (USP Reference Standard). The concentration values for these internal reference standards are assigned using Liquid Chromatography Mass Spectrometry/Mass Spectrometry (LC-MS/MS). The LC-MS/MS calibration is verified by BCR 192 and BCR 193 certified reference materials.* | nmol/L | 119 | 3.9% | 446 | 2.3% | 819 | 3.3% | 39 | 1.09 | -22.69 | 0.993 | 0.97 | 30.4 | 0.992 |
| **C-peptide**  (0078L821) | CMIA | *Calibrators are established against a set of Internal Reference Calibrators, which are traceable to the WHO International Reference Reagent for C-peptide of human insulin for immunoassay, code 84/510, established 1986, from the National Institute for Biological Standards and Control (NIBSC).* | pmol/L | 310 | 3.0% | 1269 | 3.6% | 5402 | 3.1% | 39 | 0.98 | -67.03 | 0.997 | 1.01 | 6.9 | 1.000 |
| **DHEA-S**  (00691L820) | CMIA | *Internal reference standards are manufactured gravimetrically using purified synthetic DHEA-S. This product is matched to the internal reference standards* | umol/L | 0.29 | 4.9% | 2.91 | 2.2% | 27.6 | 2.7% | 34 | 0.89 | 0.04 | 0.996 | 0.99 | 1.0 | 0.995 |
| **Free PSA**  (26058FN00) | CMIA | *Calibrators are manufactured by dilution of Prostate Specific Antigen (PSA) of known concentration to obtain a target concentration. The target concentration is referenced against the Stanford 90:10 PSA Reference Material at each concentration level.* | ug/L | 0.43 | 2.3% | 1.08 | 2.3% | 7.08 | 4.1% | 38 | 0.89 | -0.07 | 0.977 | 1.01 | 0.0 | 0.999 |
| **Homocysteine**  (1139UP00) | CMIA | *Calibrators are manufactured gravimetrically with S-adenosyl-L-homocysteine (SAH) in phosphate buffer and tested for acceptance using internal reference standards* | umol/L | 8.0 | 4.1% | 13.5 | 4.6% | 26.9 | 3.6% |  |  |  |  |  |  |  |
| **Insulin**  (35517LP62) | CMIA | *Calibrators of Alinity i Insulin are referenced to the World Health Organization (WHO) Insulin 1st International Reference Preparation, 66/304.* | pmol/L | 56.10 | 2.7% | 280.0 | 1.8% | 867 | 1.9% | 54 | 0.90 | -7.33 | 0.987 | 1.04 | -2.4 | 0.999 |
| **iPTH**  (032308180) | CMIA | *Calibrator values are established against a set of Internal Reference Calibrators, which are traceable to the World Health Organization’s first international standard for PTH from the NIBSC, code 79/500.* | pmol/L | 6.53 | 4.3% | 19.1 | 1.8% | 114 | 1.8% | 36 | 0.98 | 0.15 | 0.908 | 1.01 | 0.6 | 0.998 |
| **SHBG**  (07746L820) | CMIA | *Calibrators are determined against the Internal Reference Calibrators, which are traceable to the World Health Organization’s second international standard for SHBG from the NIBSC, code 08/266* | nmol/L | 9.26 | 4.4% | 25.5 | 3.8% | 149.9 | 4.5% | 39 | 0.90 | 0.06 | 0.988 | 0.98 | 3.4 | 0.987 |
| **Total PSA**  (27633FN00) | CMIA | *Calibrators are manufactured by dilution of Prostate Specific Antigen (PSA) of known concentration to obtain a target concentration. The target concentration is referenced against the World Health Organization (W.H.O.) 1st International Standard for Prostate Specific Antigen (90:10) 96/670 at each concentration level.* | ug/L | 0.47 | 4.0% | 3.91 | 3.7% | 21.6 | 4.3% | 37 | 1.04 | -0.76 | 0.991 | 0.98 | 2.2 | 0.997 |

*grey indicates analysis not completed. All quality control materials were Abbott Diagnostics. Lot numbers are provided under each assay name.

**Supplemental Table 2**. Age- and sex-specific verification for all assays assessed.

| **Analyte (unit)** | **Partition** | **LL** | **90% CI** | **UL** | **90% CI** | **N** | **Percent Within RI** | **Percent Within CI** |
| --- | --- | --- | --- | --- | --- | --- | --- | --- |
| **Anti-CCP (kU/L)** | 0-<19 years | NA | NA | 0.5 | NA | 106 | 71% | 71% |
| **Anti-Tg (kU/L)** | 0-<19 years | 0.4 | (0.3, 0.4) | 17.7 | (12.7, 32.4) | 101 | 96% | 99% |
| **Anti-TPO (kU/L)** | 0-<19 years | NA | NA | 1.0 | NA | 99 | 92% | 92% |
| **CA 15-3 (kU/L)** | 0-<1 week | 3.4 | (1.8, 4.9) | 24 | (21, 25) | 0 | NA | NA |
| 1 week-<1 year | 4.9 | (4.2, 5.6) | 33 | (29, 35) | 15 | 93% | 93% |
| 1-<19 years | 3.9 | (3.6, 4.6) | 21 | (18, 23) | 91 | 95% | 100% |
| **CA 19-9 (kU/L)** | 0-<1 year | NA | NA | 64 | (53, 88) | 15 | 87% | 87% |
| 1-<19 years | NA | NA | 41 | (29, 69) | 86 | 93% | 98% |
| **CA 125 (kU/L)** | 0-<4 months | 2.4 | (1.7, 3.0) | 22 | (19, 24) | 6 | 100% | 100% |
| 4 months-<5 years | 7.7 | (7.0, 9.3) | 33 | (32, 38) | 31 | 90% | 90% |
| 5-<11 years | 4.7 | (4.4, 5.8) | 30 | (28, 36) | 31 | 90% | 90% |
| 11-<19 years F | 5.9 | (5.0, 6.9) | 39 | (30, 41) | 18 | 89% | 89% |
| 11-<19 years M | 5.4 | (4.4, 6.2) | 28 | (23, 30) | 18 | 83% | 94% |
| **CEA (ng/mL)** | 0-<1 week | 8.1 | (6.2, 10.8) | 62 | (53.8, 70.6) | 0 | NA | NA |
| 1 week-<1 year | NA | NA | 4.7 | (3.7, 8.3) | 22 | 100% | 100% |
| 1-<19 years | NA | NA | 2.6 | (2.5, 2.8) | 79 | 94% | 95% |
| **Cortisol (nmol/L)** | 2-<15 days | 13.1 | (3.2, 19.7) | 339.5 | (303, 499.5) | 0 | NA | NA |
| 15 days-<1 year | 14.3 | (10.2, 21.2) | 458.1 | (430.3, 489.8) | 15 | 93% | 93% |
| 1-<9 years | 47.8 | (28.2, 57) | 297 | (277.1, 368.7) | 38 | 89% | 95% |
| 9-<14 years | 60.5 | (46.2, 66.4) | 349.2 | (334.8, 376.9) | 18 | 89% | 100% |
| 14-<17 years | 76.9 | (50.8, 89.8) | 452.5 | (435.8, 477.7) | 18 | 100% | 100% |
| 17-<19 years | 97.0 | (84.9, 128.4) | 505.7 | (453.7, 530.8) | 11 | 91% | 91% |
| **C-peptide (pmol/L)** | 0-<1 year | 70 | (59, 80) | 1448 | (1086, 1672) | 15 | 100% | 100% |
| 1-<6 years | 116 | (90, 151) | 1477 | (1324, 1986) | 27 | 100% | 100% |
| 6-<19 ears | 257 | (236, 278) | 2241 | (2094, 2387) | 58 | 88% | 91% |
| **DHEA-S (umol/L)** | 0-<2 months | 28.9 | (15.0, 33.1) | >40.7 | NA | 1 | 0% | 0% |
| 2-<6 months | 0.65 | (0.50, 0.85) | 15.6 | (13.2, 18.1) | 10 | 70% | 70% |
| 6 months-<1 year | 0.15 | (0.12, 0.19) | 4.79 | (3.95, 5.64) | 3 | 100% | 100% |
| 1-<6 years | 0.07 | (0.06, 0.09) | 3.03 | (2.38, 3.71) | 26 | 100% | 100% |
| 6-<9 years | 0.14 | (0.09, 0.21) | 4.14 | (3.65, 4.66) | 11 | 91% | 100% |
| 9-<13 years | 0.90 | (0.50, 1.00) | 7.3 | (6.60, 11.2) | 15 | 87% | 100% |
| 13-<16 years | 1.5 | (1.09, 1.98) | 12.5 | (11.4, 13.5) | 17 | 100% | 100% |
| 16-<19 years F | 3.96 | (3.55, 4.41) | 15.5 | (13.6, 17.3) | 7 | 100% | 100% |
| 16-<19 years M | 3.36 | (1.80, 4.83) | 18.2 | (16.5, 19.7) | 8 | 100% | 100% |
| **Free PSA (ug/L)** | 0-<19 years F | NA | NA | 0.097 | (0.044, 0.194) | 56 | 100% | 100% |
| 0-<12 years M | NA | NA | 0.008 | NA | 28 | 96% | 96% |
| 12-<19 years M | NA | NA | 0.279 | (0.223, 0.552) | 16 | 94% | 100% |
| **Homocysteine (umol/L)** | 5 days-<1 year | 2.87 | (2.28, 3.02) | 9.99 | (9.7, 10.93) | 17 | 100% | 100% |
| 1-<7 years | 2.76 | (2.21, 3.01) | 7.62 | (6.89, 8.77) | 20 | 90% | 100% |
| 7-<12 years | 3.43 | (3.28, 3.86) | 8.45 | (8.08, 9.15) | 14 | 79% | 79% |
| 12-<15 years F | 4.07 | (3.8, 4.43) | 10.36 | (9.66, 10.91) | 13 | 69% | 77% |
| 15-<19 years F | 4.92 | (4.67, 5.22) | 11.88 | (11.23, 12.47) | 8 | 75% | 100% |
| 12-<15 years M | 4.71 | (4.48, 4.87) | 10.4 | (9.78, 10.87) | 18 | 89% | 89% |
| 15-<19 years M | 5.50 | (5.17, 5.76) | 13.39 | (12.96, 13.83) | 11 | 91% | 91% |
| **Insulin (pmol/L)** | 0-<1 year | 6.64 | (4.98, 8.49) | 163 | (144, 182) | 9 | 100% | 100% |
| 1-<6 years | 9.11 | (6.4, 12.1) | 279 | (233, 332) | 33 | 97% | 100% |
| 6-<19 years | 15.2 | (8.50, 21.8) | 345 | (273, 371) | 61 | 93% | 97% |
| **PTH (intact) (pmol/L)** | 0-<1 year | 0.68 | (0.42, 0.91) | 9.39 | (7.93, 15.48) | 15 | 93% | 100% |
| 1-<9 years | 1.72 | (1.41, 1.83) | 6.68 | (6.29, 7.72) | 43 | 88% | 93% |
| 9-<17 years | 2.32 | (2.18, 2.4) | 9.28 | (8.52, 9.82) | 39 | 87% | 95% |
| 17-<19 years | 1.70 | (1.59, 1.84) | 6.40 | (6.15, 6.75) | 9 | 78% | 78% |
| **SHBG (nmol/L)** | 0-<1 month | 14.4 | (12.42, 16.7) | 120 | (100, 138) | 2 | 0% | 50% |
| 1 month -<1 year | 36.2 | (14.2, 54.1) | 229 | (204, 242) | 9 | 100% | 100% |
| 1-<8 years | 41.8 | (21.5, 45.8) | 189 | (179, 210) | 31 | 97% | 100% |
| 8-<11 years | 26.4 | (14.5, 28.7) | 162 | (155, 174) | 17 | 100% | 100% |
| 11-<13 years | 14.9 | (9.2, 17.6) | 108 | (106, 134) | 14 | 86% | 93% |
| 13-<15 years | 11.2 | (8.1, 14.8) | 98.2 | (106, 134) | 15 | 93% | 93% |
| 15-<17 years | 9.8 | (7.34, 13.3) | 84.1 | (76.2, 91.5) | 7 | 71% | 86% |
| 17-<19 years F | 10.8 | (8.04, 15.2) | 155 | (135, 169) | 5 | 100% | 100% |
| 15-<19 years M | 9.7 | (8.4, 11.8) | 49.6 | (44.7, 102) | 12 | 100% | 100% |
| **Total PSA (ug/L)** | 0-<1 week F | NA | NA | 0.039 | (0.029, 0.051) | 0 | NA | NA |
| 1 week-<1 year F | NA | NA | 0.010 | (0.006, 0.016) | 6 | 100% | 100% |
| 1-<19 years F | NA | NA | 0.015 | (0.011, 0.020) | 42 | 98% | 98% |
| 0-<1 week M | NA | NA | 0.047 | (0.039, 0.055) | 0 | NA | NA |
| 1 week-<6 months M | NA | NA | 0.038 | (0.030, 0.046) | 7 | 100% | 100% |
| 6 months-<12 years M | NA | NA | 0.353 | (0.287, 0.454) | 24 | 100% | 100% |
| 12-<19 years M | NA | NA | 0.566 | (0..509, 0.625) | 20 | 100% | 100% |
